# Supplementary material for: Benchmarking multimodel terrestrial water storage seasonal cycle against Gravity Recovery and Climate Experiment (GRACE) observations over major global river basins
Source: Copernicus journal article supplement (doi:10.5194/hess-28-1725-2024), 2024-04-15
Supplement: Supplementary file 1 [file hess-28-1725-2024-supplement.pdf]

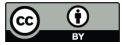

*Supplement of*

**Benchmarking multimodel terrestrial water storage seasonal cycle against Gravity Recovery and Climate Experiment (GRACE) observations over major global river basins**

**Sadia Bibi et al.**

*Correspondence to:* Tingju Zhu (tingjuzhu@intl.zju.edu.cn)

The copyright of individual parts of the supplement might differ from the article licence.

## List of abbreviations

|             |                                                                |
|-------------|----------------------------------------------------------------|
| TWS         | Terrestrial Water Storage                                      |
| GRACE       | Gravity recovery and climate experiment                        |
| GHMs        | Global hydrological models                                     |
| LSMs        | Land Surface Models                                            |
| CSR-M       | University of Texas Center for Space Research mascon solutions |
| JPL-M       | Jet Propulsion Laboratory mascon solutions                     |
| WRR1        | Water Resources Reanalysis 1 and 2                             |
| WRR2        |                                                                |
| E2O         | earth2Observe                                                  |
| EU-FP7      | European Union's Seventh Framework Programme                   |
| WATCH       | WATER and global CHange                                        |
| WFDEI       | WATCH Forcing Data applied to the ERA-Interim data             |
| MSWEP       | Multi-Source Weighted Ensemble Precipitation                   |
| LISFLOOD    | -                                                              |
| HBV-SIMREG  | -                                                              |
| W3RA        | Worldwide water Resources Assessment                           |
| SWABM       | Simple Water Balance Model                                     |
| WaterGAP3   | Water – Global Assessment and Prognosis-3                      |
| HTESSEL     | Hydrology Tiled ECMWF Scheme for Surface Exchanges over Land   |
| JULES       | Joint UK Land Environment Simulator                            |
| Surfex-Trip | Surface Externalisée-Trip                                      |

### Correlation coefficient (R)

The correlation coefficient (R) is the frequently used statistic to quantify the patterns of similarity between two variables (f) and (r) which are defined at N discrete points (in time and/or space).

$$R = \frac{\frac{1}{N} \sum_{n=1}^N (f_n - \bar{f})(r_n - \bar{r})}{\sigma_f \sigma_r} \quad (3)$$

where  $\bar{f}$  and  $\bar{r}$  are the mean values and  $\sigma_f$  and  $\sigma_r$  are the standard deviations of “f” and “r”, respectively.

R reaches to 1 (maximum value) when for all n,  $(f_n - \bar{f}) = \alpha(r_n - \bar{r})$ , where  $\alpha$  is a positive constant. In this instance, the two fields are not equal unless  $\alpha = 1$ , despite sharing the same centered pattern of variation. Therefore, it is unlikely that the two models have the same amplitude of variance as R alone.

### RMS difference (E)

RMS is the most frequently used statistic to quantify differences between two fields (f and r) and is defined by

$$E = \frac{1}{N} \sum_{n=1}^N [(f_n - \bar{f}) - (r_n - \bar{r})]^2 \quad (4)$$

The standard deviation of “f” ( $\sigma_f$ ) is defined as following

$$E = \frac{1}{N} \sum_{n=1}^N (f_n - \bar{f})^2 \quad (5)$$

And of “r” ( $\sigma_r$ ) is

$$E = \frac{1}{N} \sum_{n=1}^N (r_n - \bar{r})^2 \quad (6)$$

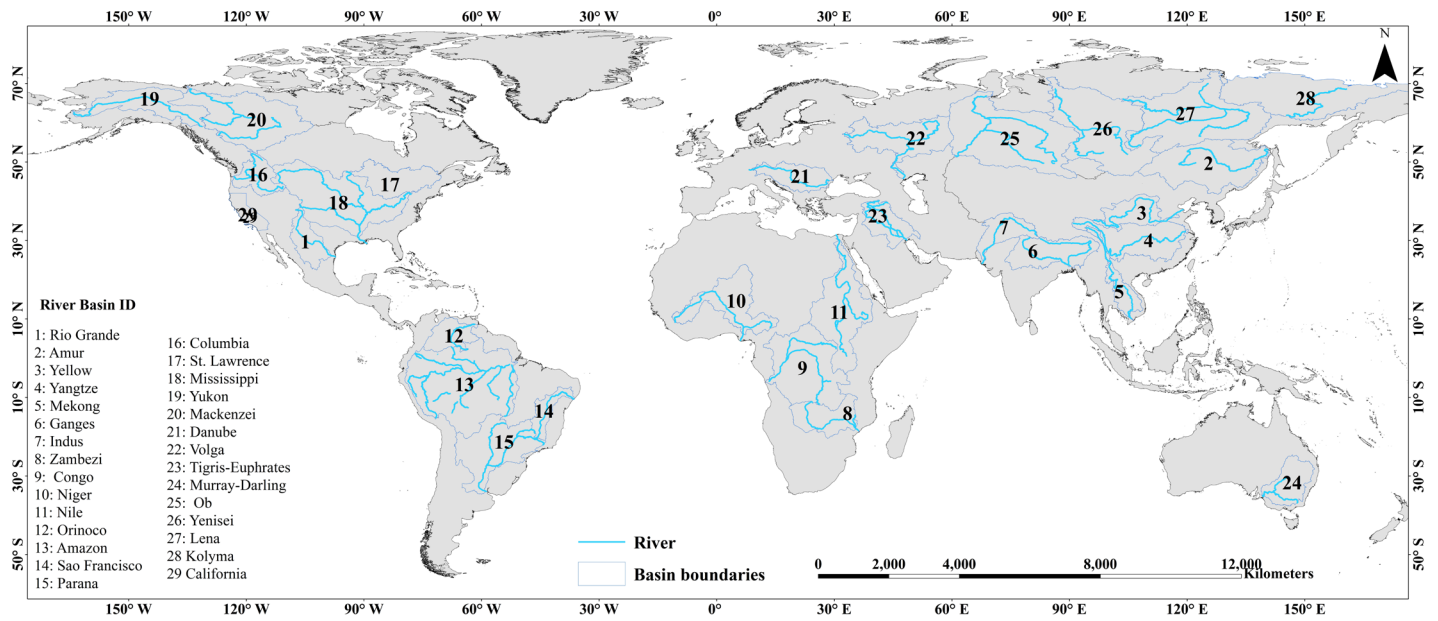

**Figure S1:** Selected 29 major global river basins.

Nine river basins including Amur (2), Saint Lawrence (17), Yukon (19), Mackenzie (20), Volga (22), Ob (25), Yenisei (26), Lena (27), and Kolyma (28) were selected from the boreal zone. Among them, five basins (i.e., Yukon, Mackenzie, Yenisei, Lena, and Kolyma) have heterogeneous climate conditions from polar to boreal and one basin (i.e., Saint Lawrence) is in boreal to temperate zones. Eleven river basins in the temperate zone were selected. Out of these, three basins i.e., Columbia (16), Mississippi (18), and the Danube (21) are located in the cold to temperate zone, and four basins i.e., Rio Grande (1), Euphrates (23), Murray-Darling (24), and California (29) in temperate to arid zone while four river basins Yellow River (3), Yangtze (4), Brahmaputra-Ganga (6), Indus (7) shares polar to the temperate and arid climate. Five basins, including Zambezi (8), Niger (10), Nile (11), São Francisco (14), and Parana (15), were selected from the arid zone and four major river basins in the tropical zone, including Mekong (5), Congo (9), Orinoco (12), and Amazon (13).

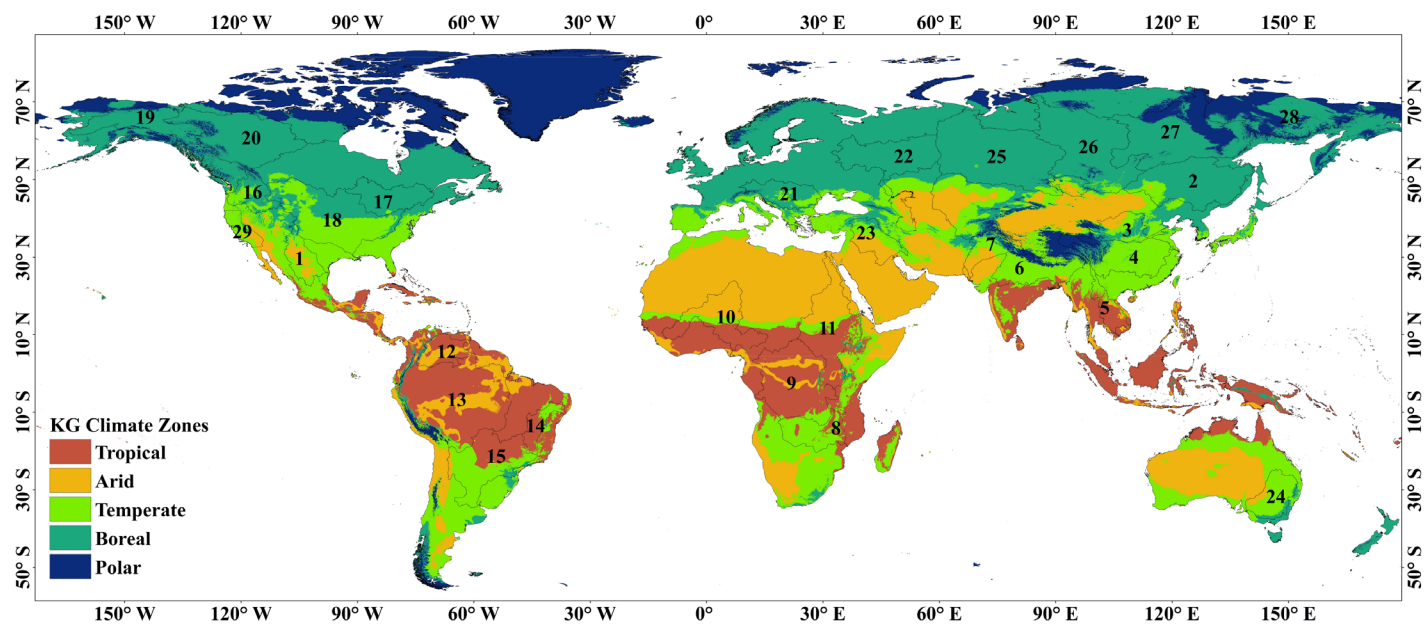

**Figure S2:** KG Clim Climate Zones (1983-2013) classification

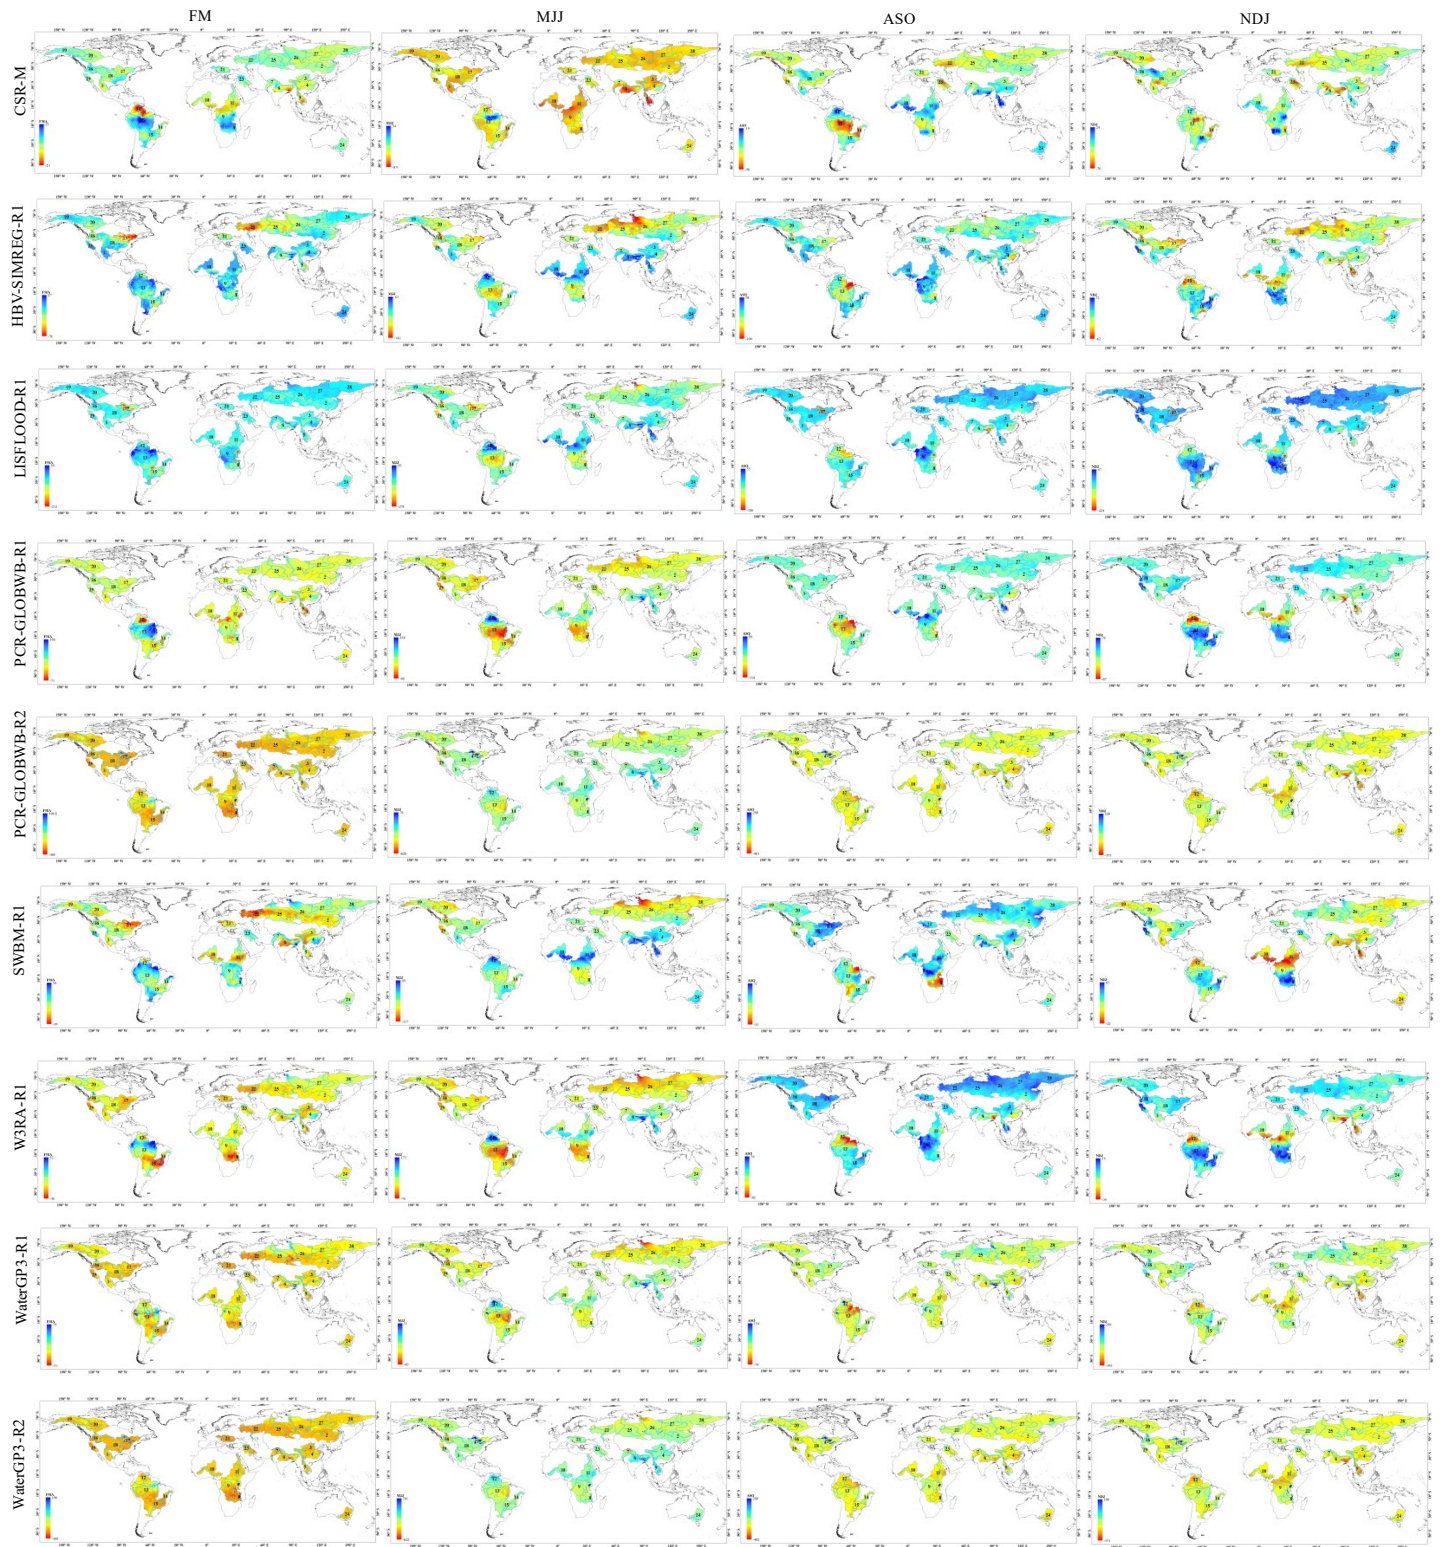

**Figure S3:** Seasonal maps for GRACE CSR-M and GHM R1 and R2

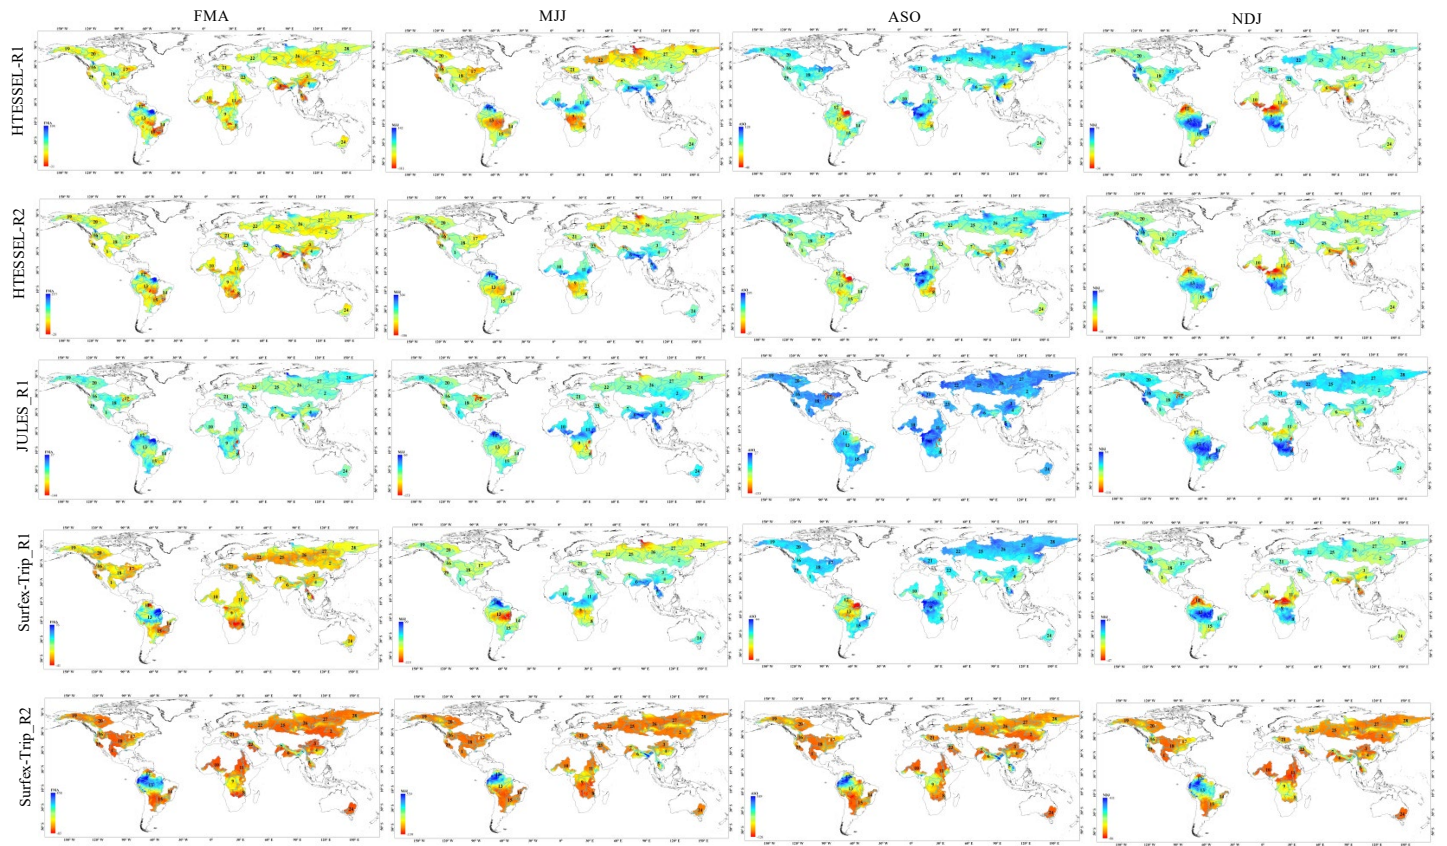

**Figure S4:** Seasonal maps of LSM R1 and R2

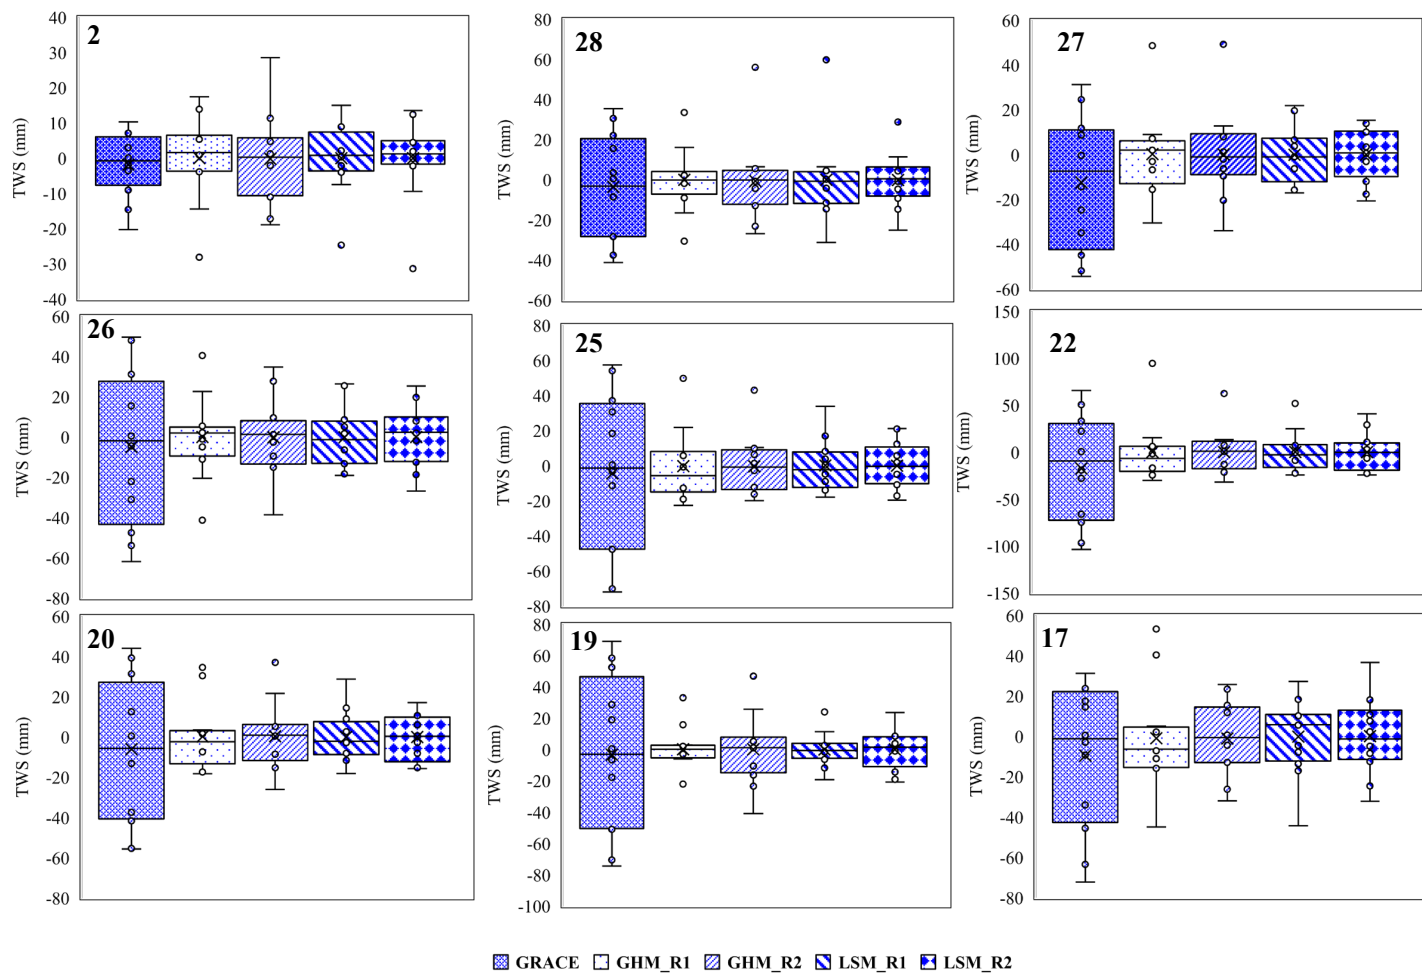

**Figure S5:** Distribution of GRACE and grouped model type (GHM or LSM) and forcing resolution (R1 and R2) in the Boreal zone.

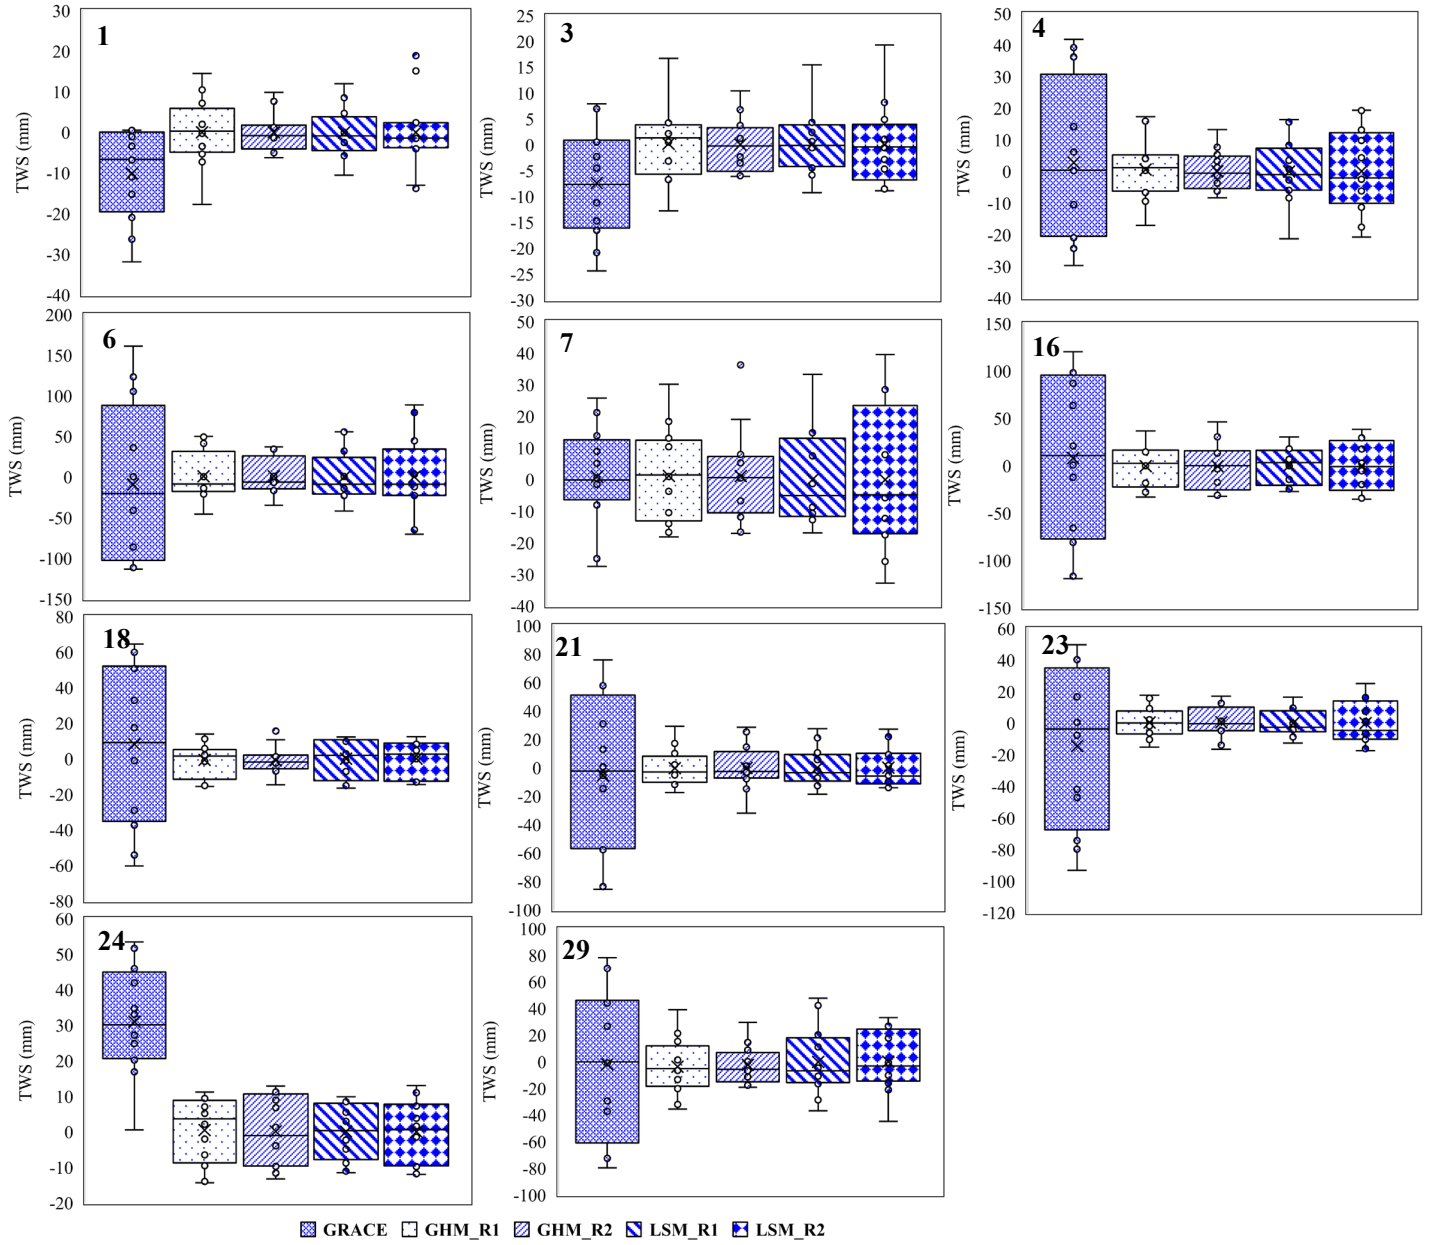

**Figure S6:** Distribution of GRACE and grouped model type (GHM or LSM) and forcing resolution (R1 and R2) in the Temperate zone.

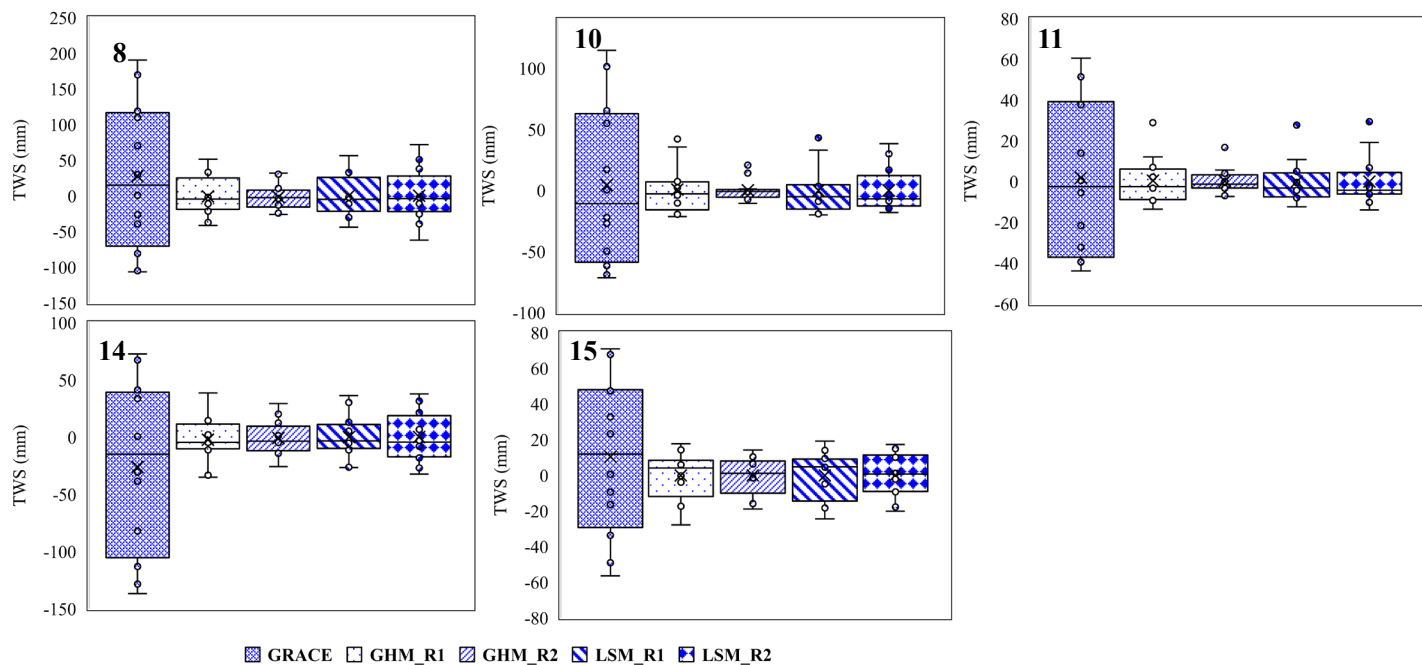

**Figure S7:** Distribution of GRACE and grouped model type (GHM or LSM) and forcing resolution (R1 and R2) in the Arid zone.

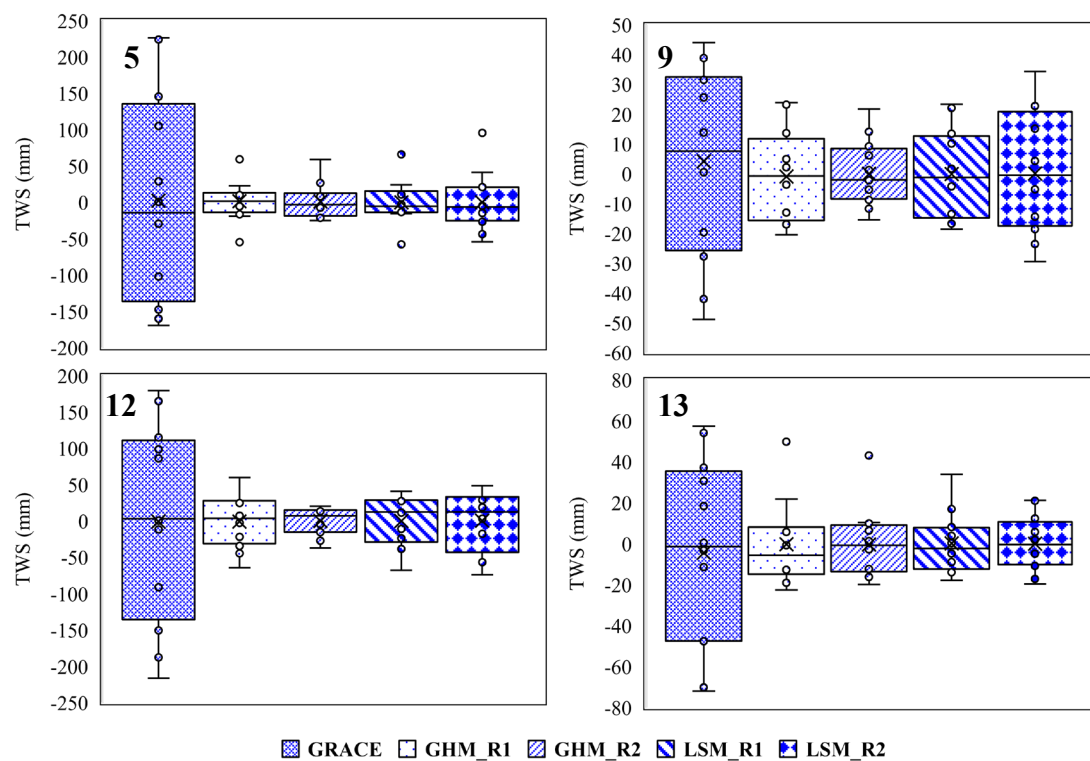

**Figure S8:** Distribution of GRACE and grouped model type (GHM or LSM) and forcing resolution (R1 and R2) in the Tropical zone.
